# Supplementary material for: Distribution and Phylogeny of Erythrocytic Necrosis Virus (ENV) in Salmon Suggests Marine Origin
Source: MDPI journal article supplement (doi:10.3390/v11040358), 2019-04-18

### Summary of results from ENV sequence enrichment

50-by or larger sequence alignments to putative ENV protein-encoding sequences with 99% or higher nucleotide identity from samples enriched for these sequences are summarized below. Green cells indicate detection of a putative ENV sequence in each of the fish samples enriched for ENV sequences, while grey cells indicate that a sequence was not found (left). The number of sequences found in individual fish from enrichments and between samples is shown in the Venn diagram (right)

| SEQ ID  | Herring | Chinook | Atlantic |
|---------|---------|---------|----------|
| SEQ_103 |         |         |          |
| SEQ_106 |         |         |          |
| SEQ_19  |         |         |          |
| SEQ_20  |         |         |          |
| SEQ_24  |         |         |          |
| SEQ_30  |         |         |          |
| SEQ_32  |         |         |          |
| SEQ_4   |         |         |          |
| SEQ_40  |         |         |          |
| SEQ_46  |         |         |          |
| SEQ_49  |         |         |          |
| SEQ_5   |         |         |          |
| SEQ_50  |         |         |          |
| SEQ_52  |         |         |          |
| SEQ_54  |         |         |          |
| SEQ_57  |         |         |          |
| SEQ_62  |         |         |          |
| SEQ_63  |         |         |          |
| SEQ_65  |         |         |          |
| SEQ_69  |         |         |          |
| SEQ_70  |         |         |          |
| SEQ_73  |         |         |          |
| SEQ_74  |         |         |          |
| SEQ_75  |         |         |          |
| SEQ_77  |         |         |          |
| SEQ_78  |         |         |          |
| SEQ_79  |         |         |          |
| SEQ_80  |         |         |          |
| SEQ_81  |         |         |          |
| SEQ_86  |         |         |          |
| SEQ_87  |         |         |          |
| SEQ_89  |         |         |          |
| SEQ_92  |         |         |          |
| SEQ_93  |         |         |          |
| SEQ_98  |         |         |          |

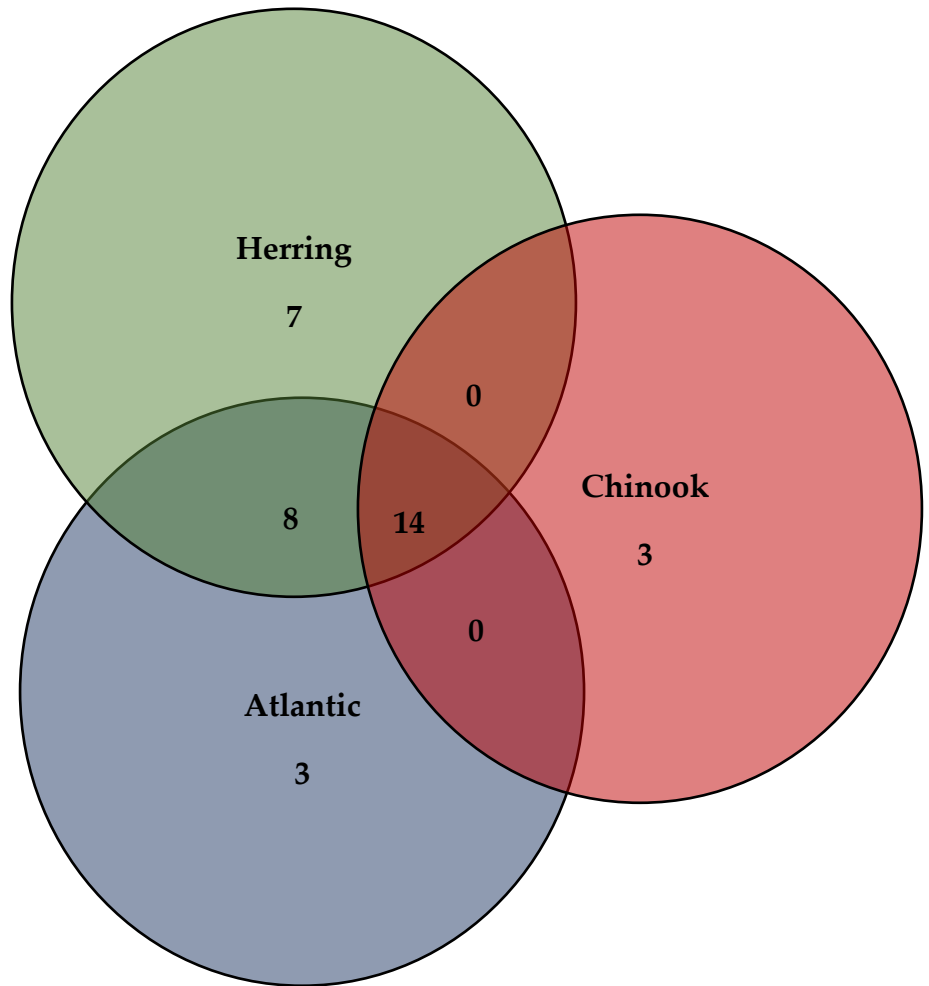

Supplement: s1 [file s1]
