# Supplementary material for: Distribution and Phylogeny of Erythrocytic Necrosis Virus (ENV) in Salmon Suggests Marine Origin
Source: MDPI journal article supplement (doi:10.3390/v11040358), 2019-04-18
Supplement: s1 [file s1]

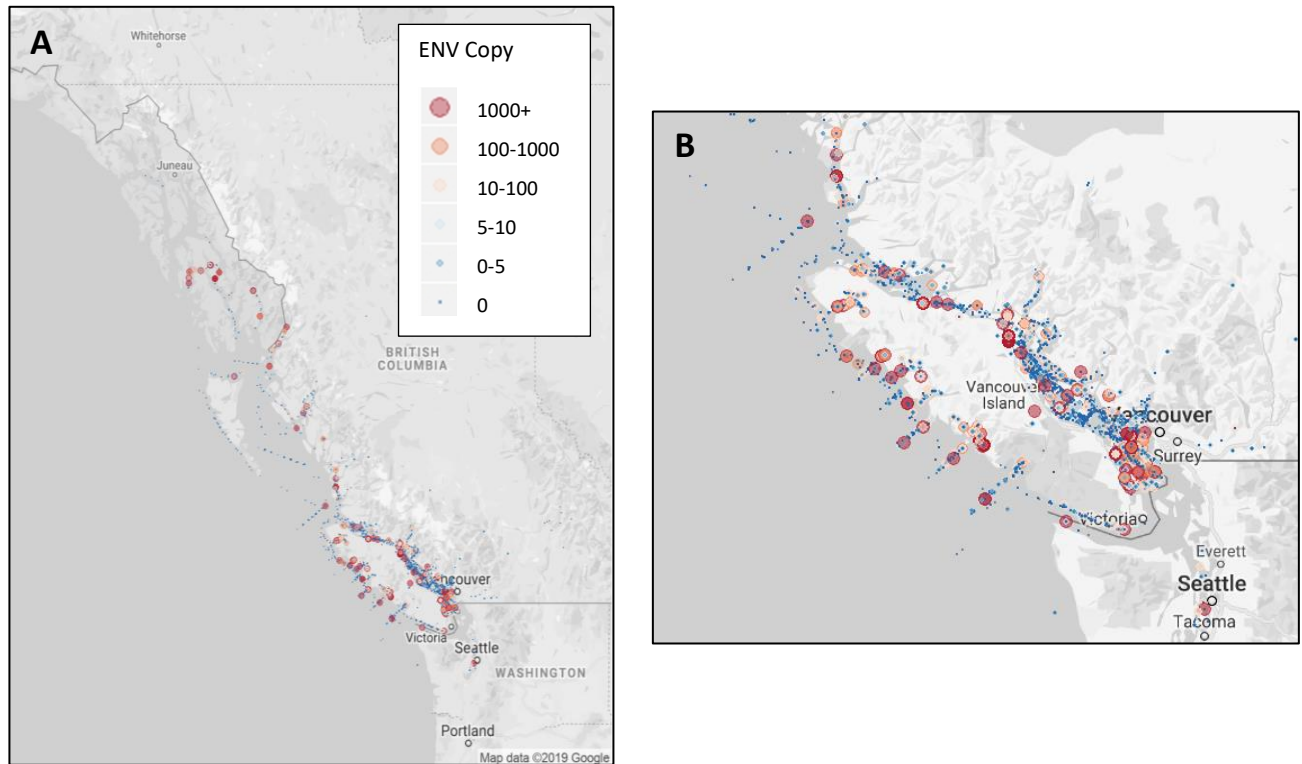

**Figure S1: Sampling effort and ENV detection map**

**(A)** Sampling locations, with large dots representing fish with higher ENV copy number. Transparency indicates the number of points at each sampling locations, with darker points representing greater sampling density at a location. **(B)** shows Vancouver Island inset maps. Adults and smolts of all species are shown and LOD criteria are not applied.

**Table S1: List of taxa abbreviations used in tables and figures**

|             |                                                 |
|-------------|-------------------------------------------------|
| Aedes taen. | Aedes taeniorhynchus iridescent virus           |
| ATV         | Ambystoma tigrinum virus                        |
| AVIV        | Armadillium vulgare iridescent virus            |
| BM          | Brazilian marseillevirus                        |
| CQIV        | Cherax quadricarinatus iridovirus               |
| ECV         | European catfish virus                          |
| EHNV        | Epizootic haematopoietic necrosis virus         |
| ENV         | Erythrocytic necrosis virus                     |
| FV3         | Frog virus 3                                    |
| GIV         | Grouper Iridovirus                              |
| IIV         | Invertebrate iridescent virus (various strains) |
| ISKNV       | Infectious spleen and kidney necrosis virus     |
| LCDV        | Lymphocystis disease virus (various strains)    |
| LMBV        | Largemouth bass/ Santee Cooper ranavirus        |
| LMRV        | Lacerta monticola ranavirus                     |
| RBIV        | Rock Bream iridovirus                           |
| RM          | Ranavirus maximus                               |
| RMIV        | Regular mosquito iridescent virus               |
| RSIV        | Red Sea Bream iridovirus                        |
| SGIV        | Singapore Grouper iridovirus                    |
| SHIV        | Shrimp hemocyte iridescent virus                |
| TRBIV       | Turbot reddish body iridovirus                  |

**Table S2: ENV BLAST summary**

Putative ENV sequences obtained from assembled transcripts of 150 AA or longer which consistently mapped to proteins of similar function when searched by BLAST A) as nucleotide sequence to the NR database B) as predicted proteins from GeneMark to the NR database, C) to the Lymphocystis disease virus transcriptome. A list of taxon abbreviations used is given in Table S1. Columns highlighted in green indicate sequences with BLAST hits to genes which are conserved in all Nucleo-Cytoplasmic Large DNA Virus genomes (Yutin et al. 2009).

| SEQ ID                                    | Length (AA) | A) NR BLAST |                                    |       | B) Predicted Protein BLAST |                                    |       | C) LCDV BLAST                                    |       |
|-------------------------------------------|-------------|-------------|------------------------------------|-------|----------------------------|------------------------------------|-------|--------------------------------------------------|-------|
|                                           |             | Taxon       | Protein                            | % Id. | Taxon                      | Protein                            | % Id. | Protein                                          | % Id. |
| 82                                        | 796         | LCDV        | Hyp. gp092                         | 30    | LCDV                       | Hyp. gp092                         | 30    | Hyp. gp092                                       | 30    |
| 87                                        | 551         | LCDV        | helicase                           | 38    | CQIV                       | helicase                           | 38    | Hyp. helicase                                    | 38    |
| 89                                        | 417         | IIV 25      | Transcription elongation factor    | 51    | RM                         | Transcription elongation factor    | 37    | Transcription factor                             | 36    |
| 90                                        | 431         | IIV 22      | Hyp. 079L                          | 26    | IIV 3                      | Hyp. 069L                          | 24    | N/A                                              |       |
| 92                                        | 395         | SGIV        | helicase                           | 50    | ATV                        | helicase                           | 27    | N/A                                              |       |
| 94                                        | 339         | CQIV        | 154R                               | 42    | CQIV                       | 154R                               | 47    | Replicaton factor or DNA binding/packing protein | 43    |
| 95                                        | 329         | GIV         | ORF019R                            | 34    | CQIV                       | ORF019R                            | 34    | Myristylated membrane protein                    | 31    |
| 96                                        | 329         | IIV 22      | Uvr/REP helicase                   | 56    | AVIV                       | Uvr/REP helicase                   | 56    | Hyp. 090R                                        | 38    |
| 98                                        | 295         | SGIV        | RNase III                          | 36    | LCDV                       | RNase III                          | 40    | RNase III                                        | 41    |
| 100                                       | 231         | LCDV        | Hyp. gp057                         | 33    | LCDV                       | Hyp. gp057                         | 32    | Hyp. gp057                                       | 32    |
| 101                                       | 228         | GIV         | 004L                               | 38    | CQIV                       | 004L                               | 28    | SWI/SNF2 helicase                                | 32    |
| 102                                       | 218         | TRBIV       | Cytosine DNA methyl-transferase    | 57    | ISKNV                      | Cytosine DNA methyl-transferase    | 58    | DNA methyltransferase                            | 48    |
| 103                                       | 212         | LCDV        | Deoxynucleoside kinase             | 31    | CQIV                       | Deoxynucleoside kinase             | 35    | Deoxynucleoside kinase                           | 31    |
| 104                                       | 205         | CQIV        | 103L                               | 49    | CQIV                       | 103L                               | 49    | Papain-like proteinase                           | 46    |
| 105                                       | 189         | CQIV        | 141L                               | 42    | CQIV                       | 141L                               | 42    | N/A                                              |       |
| 107                                       | 176         | LCDV        | Proliferating cell nuclear antigen | 30    | LCDV                       | Proliferating cell nuclear antigen | 30    | Proliferating cell nuclear antigen               | 30    |
| <b>Contigs with similar functionality</b> |             |             |                                    |       |                            |                                    |       |                                                  |       |
| DNA repair exonuclease                    |             |             |                                    |       |                            |                                    |       |                                                  |       |
| 83                                        | 712         | CQIV        | DNA repair exonuclease             | 46    | BM                         | Put. DNA repair exonuclease        | 51    | Hyp. gp105                                       | 32    |
| 84                                        | 662         | CQIV        | 116L                               | 27    | CQIV                       | 116L                               | 29    | N/A                                              |       |
| 85                                        | 662         | CQIV        | 116L                               | 27    | IIV6                       | 116L                               | 29    | N/A                                              |       |
| 91                                        | 397         | GIV         | 125R                               | 32    | IIV6                       | Flap endonuclease                  | 30    | putative XPG/RAD2-type nuclease                  | 28    |
| 22                                        | 166         | CQIV        | Repair exonuclease subunit SbcCD   | 54    | IIV6                       | 244L                               | 40    | N/A                                              |       |
| DNA dependent RNA polymerase              |             |             |                                    |       |                            |                                    |       |                                                  |       |
| 77                                        | 1491        | CQIV        | DNA dep. RNA polymerase (alpha)    | 38    | LCDV                       | DNA directed RNA polymerase        | 38    | RNA dependent RNA polymerase                     | 38    |
| 78                                        | 1360        | LCDV        | DNA dep. RNA polymerase            | 38    | ENV                        | DNA-dependent RNA polymerase,      | 100   | RNA polymerase beta subunit                      | 38    |
| early iridovirus protein                  |             |             |                                    |       |                            |                                    |       |                                                  |       |
| 81                                        | 798         | CQIV        | Hyp. 079L                          | 29    | CQIV                       | Hyp. 079L                          | 29    | Hyp. 128R                                        | 29    |
| 106                                       | 181         | LCDV        | EIP                                | 32    | LCDV                       | EIP                                | 33    | EIP                                              | 33    |
| 21                                        | 176         | CQIV        | Hyp. 079L                          | 32    | SHIV                       | ICP-46                             | 32    | Hyp. 128R                                        | 27    |
| Phosphotransferase                        |             |             |                                    |       |                            |                                    |       |                                                  |       |
| 97                                        | 311         | CQIV        | 144L                               | 26    | CQIV                       | 144L                               | 25    | phosphotransferase                               | 29    |
| 99                                        | 278         | SGIV        | Phospho-transferase                | 35    | LCDV                       | Phospho-transferase                | 29    | phosphotransferase                               | 32    |
| 93                                        | 362         | CQIV        | 144L                               | 26    | CQIV                       | 144L                               | 25    | Phosphotransferase                               | 29    |
| RNA dependent DNA polymerase activity     |             |             |                                    |       |                            |                                    |       |                                                  |       |
| 11                                        | 336         | LCDV        | RNA dep DNA pol                    | 47    |                            | N/A                                |       | N/A                                              |       |
| 16                                        | 265         | LCDV        | RNA dep DNA pol                    | 44    | LCDV                       | RNA dep DNA pol                    | 44    | RNA dep DNA pol                                  |       |
| 17                                        | 245         | LCDV        | RNA dep DNA pol                    | 44    |                            | N/A                                |       | N/A                                              |       |

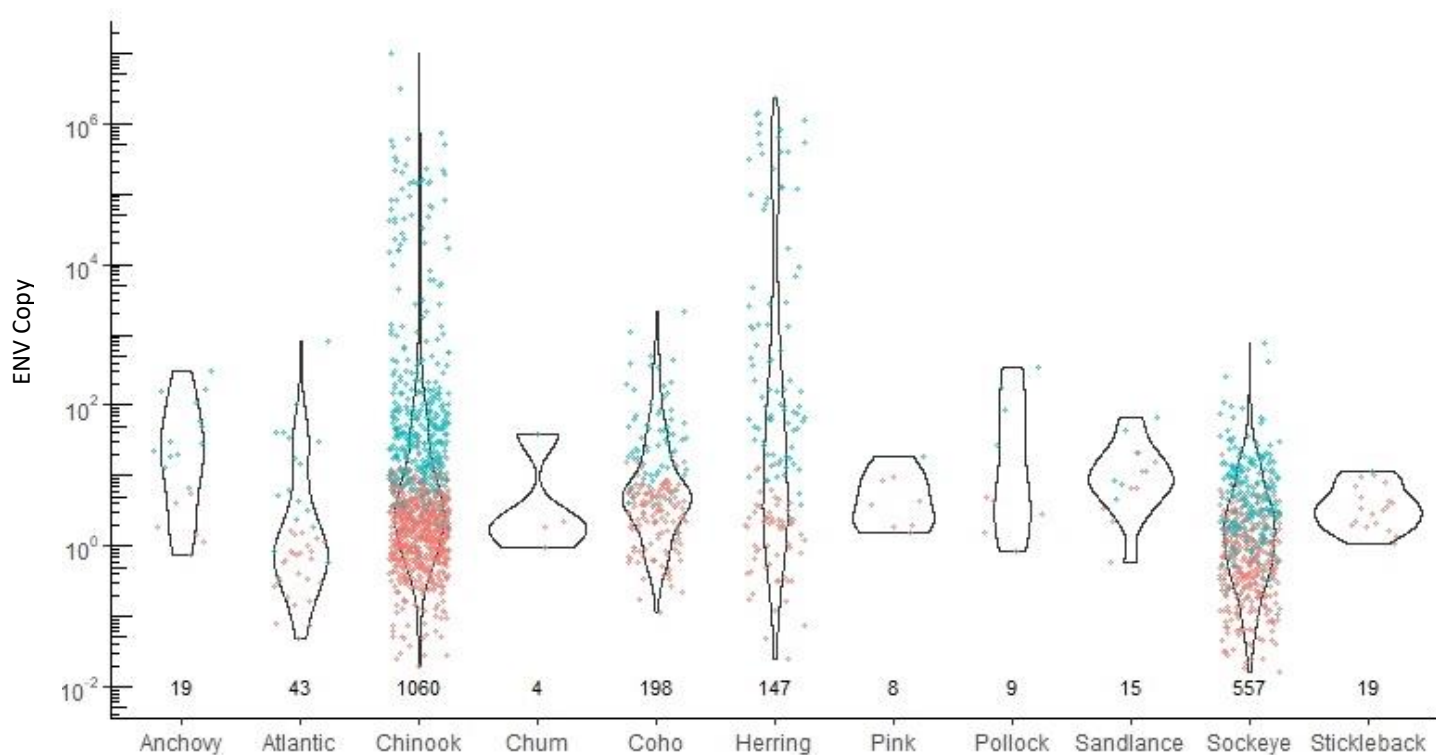

**Figure S2: ENV copy number in mixed tissue samples by species.**

Blue points indicate values with LOD criteria applied and coral points indicate copy number values which did not pass LOD criteria. Values indicate the total number ENV detections (no LOD criteria).

**Table S3: Summary of p values from pairwise tests for differences in load (L) and prevalence (P) among species**

Species with higher average loads and prevalence of ENV are listed as columns (top) and species with lower load and prevalence are shown as rows (left). Only smolt with LOD criteria applied were included in analysis.

| Species  | Coho    |         | Herring |         | Chinook |         | Sockeye |         |
|----------|---------|---------|---------|---------|---------|---------|---------|---------|
|          | L       | P       | L       | P       | L       | P       | L       | P       |
| Coho     |         |         | 7.4e-05 | 2.2e-58 |         | 1.3e-12 |         | 1.7e-05 |
| Chinook  |         |         | 1.7e-05 | 1.8e-41 |         |         |         |         |
| Pink     |         |         |         | 1.1e-28 |         | 3.9e-05 |         | 7.1e-04 |
| Sockeye  | 1.7e-12 |         | 3.2e-40 | 7.8e-48 | 2.6e-42 | 2.0e-02 |         |         |
| Atlantic | 3.9e-02 | 9.6e-08 | 2.1e-06 | 1.2e-80 | 3.6e-03 | 1.1e-35 |         | 2.9e-23 |
| Chum     |         |         |         | 7.1e-25 |         | 3.8e-04 |         | 2.9e-03 |

**Table S4: Summary of p values and sample size for tests reported in this study**

Sample sizes are listed for pairwise comparisons (A) and for species comparisons (B). Only smolt with LOD criteria were used in analysis except for tests comparing age class differences and monthly prevalence (in which both adults and smolt were examined with LOD criteria applied). In general linear models, adults are not removed from analysis explicitly, but age class is considered as a random effect to account for variation among smolt and adult fish.

| A) Statistical Tests                 |           |                              |           |                                                                            |
|--------------------------------------|-----------|------------------------------|-----------|----------------------------------------------------------------------------|
| Variable                             | Category  | Test                         | P value   | Finding                                                                    |
| ENV Load                             | Species   | Kruskal-Wallis               | 6.1e-14   | Post-hoc Dunn test                                                         |
| ENV Prevalence                       | Species   | Chi-Square                   | <2.2e-16  | Post-hoc Fisher Exact test                                                 |
| ENV Load                             | Age class | Kruskal-Wallis               | 1.8e-04   | Adult (n=164) > Smolt (n=837)                                              |
| ENV Prevalence                       | Age Class | Chi-Square                   | 1.2e-17   | Adult (164/1730 detections) > Smolt (812/17312 detections)                 |
| ENV Prevalence                       | Age Class | General Linear Mixed Effects | 1.93e-06  | Adult > Smolt *<br>*This effect only occurs in salmon species              |
| ENV Prevalence                       | Age Class | Chi-Square                   | 1.5e-11   | Salmon Species: Adult (120/1485 detections) > Smolt (724/17074 detections) |
| ENV Prevalence                       | Age Class | Chi-Square                   | 4.5e-06   | Herring: Smolt (88/238 detections) > Adult (44/245 detections)             |
| ENV Prevalence                       | Habitat   | Chi-Square                   | < 2.2e-16 | SW (811/13790 detections) > FW (1/3622 detections)                         |
| ENV Prevalence                       | Habitat   | General Linear Mixed Effects | 5.5e-08   | SW > FW                                                                    |
| ENV Prevalence                       | Monthly   | Spearman Correlation         | 0.004     | Sockeye (n=4817) $\alpha$ Atlantic (n=2450)                                |
| ENV Prevalence                       | Yearly    | Chi-Square                   | <2.2e-16  | Post-hoc Chi Squared tests with Bonferroni correction                      |
| B) Sample Size by Species (with LOD) |           |                              |           |                                                                            |
| Species                              | Adults    | Smolts                       |           |                                                                            |
| Atlantic                             | 1310      | 2454                         |           |                                                                            |
| Chinook                              | 259       | 6848                         |           |                                                                            |
| Chum                                 | 0         | 191                          |           |                                                                            |
| Coho                                 | 13        | 3652                         |           |                                                                            |
| Herring                              | 249       | 289                          |           |                                                                            |
| Pink                                 | 0         | 233                          |           |                                                                            |
| Sockeye                              | 4         | 4869                         |           |                                                                            |

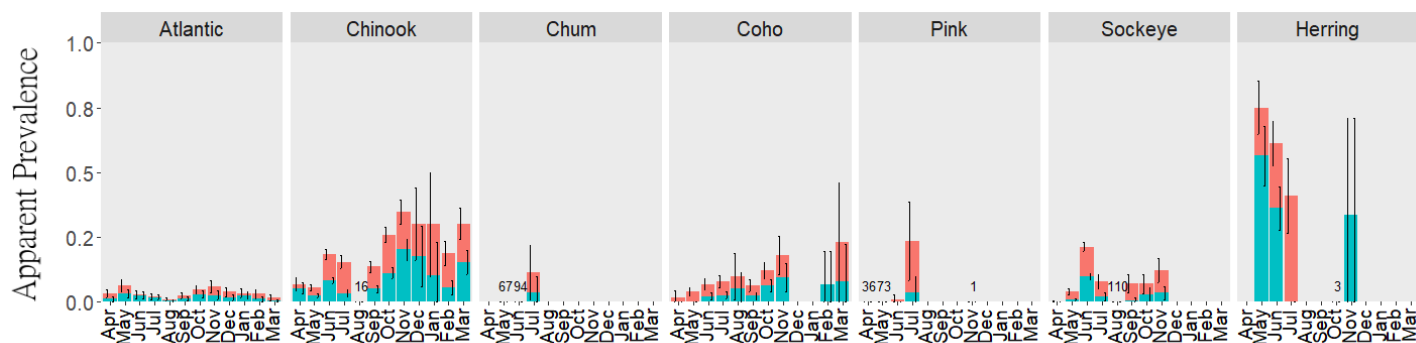

**Figure S3: Seasonal ENV prevalence by species**

Samples with LOD criteria applied are in blue and samples without LOD criteria applied are in coral, with relevant species indicated at the top. Printed values indicate sample sizes for months when prevalence was zero. Error bars indicate 95% confidence intervals. For aquaculture fish, both smolts and adults are shown. Only smolts are shown for wild fish.

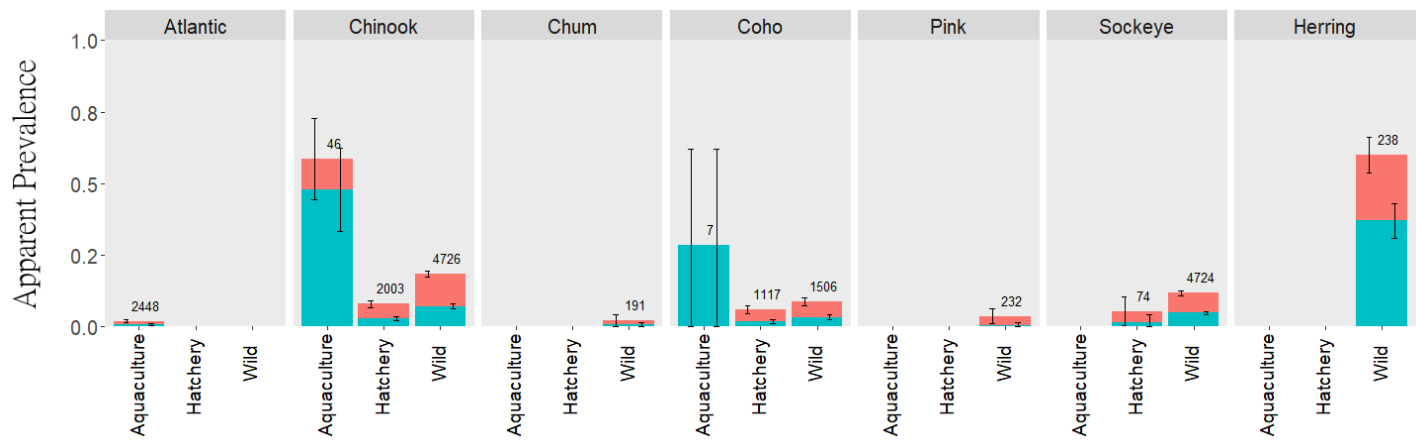

**Figure S4: ENV prevalence by population**

Samples with LOD criteria applied are in blue and samples without LOD criteria applied are in coral, with relevant species indicated at the top. Printed values indicate sample sizes and error bars indicate 95% confidence intervals. Hatchery fish represent fin-clipped hatchery fish and only smolts are shown.

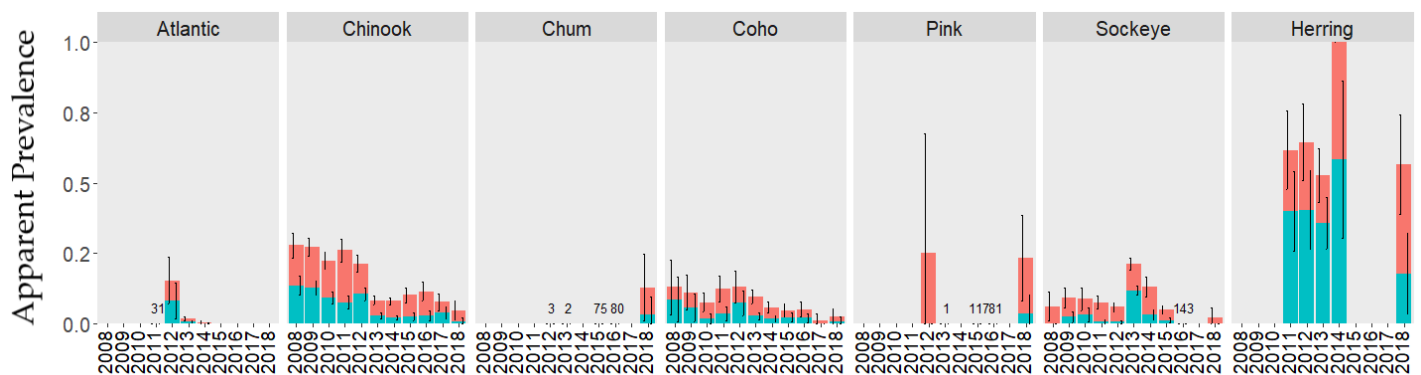

**Figure S5: ENV prevalence by year and species**

Samples with LOD criteria applied are in blue and samples without LOD criteria applied are in coral, with relevant species indicated at the top. Printed values indicate sample sizes for years with a prevalence of zero and error bars indicate 95% confidence intervals. Only smolts are shown.

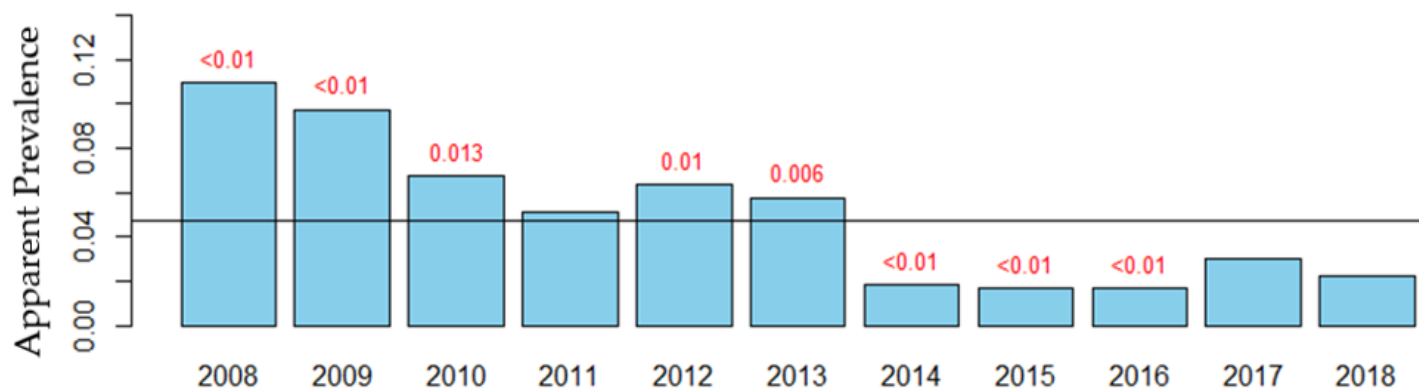

**Figure S6: ENV prevalence by year**

Total ENV prevalence by year for all salmon species and herring, showing only smolts with LOD criteria applied. Red values indicate significant p values from multiple Chi-squared Goodness of fit tests against the average prevalence (black line) with Bonferroni corrections applied. In years for which p values are not listed, ENV prevalence did not differ significantly from the overall average prevalence.
